# Supplementary material for: Isolation and Characterization of Potentially Probiotic Bacterial Strains from Mice: Proof of Concept for Personalized Probiotics
Source: PubMed Central journal article supplement (PMC6266017; doi:10.3390/nu10111684), 2018-11-05
Supplement: nutrients-10-01684-s001.pdf [file nutrients-10-01684-s001.pdf]

1 Article

2 **Isolation and Characterization of Potentially**  
3 **Probiotic Bacterial Strains from Mice: Proof of**  
4 **Concept for Personalized Probiotics**

5 Larissa S. Celiberto <sup>1,2</sup>, Roseli Aparecida Pinto <sup>1</sup>, Elizeu Antonio Rossi <sup>1</sup>,  
6 Bruce A. Vallance <sup>2,\*</sup> and Daniela C. U. Cavallini <sup>1,\*</sup>

7 <sup>1</sup> São Paulo State University (UNESP), School of Pharmaceutical Sciences,  
8 Department of Food and Nutrition, Araraquara, SP 14800-903, Brazil; larissasbaglia@gmail.com (L.S.C.);  
9 rosely@fctar.unesp.br (R.A.P.); elizeurossi@yahoo.com.br (E.A.R.)

10 <sup>2</sup> Division of Gastroenterology, Department of Pediatrics, BC Children's Hospital and the University of  
11 British Columbia, Vancouver, BC V5Z 4H4, Canada

12 \* Correspondence: bvallance@cw.bc.ca (B.A.V.); cavallinidc@fctar.unesp.br (D.C.U.C.)

13

14 **Supplementary Materials:**

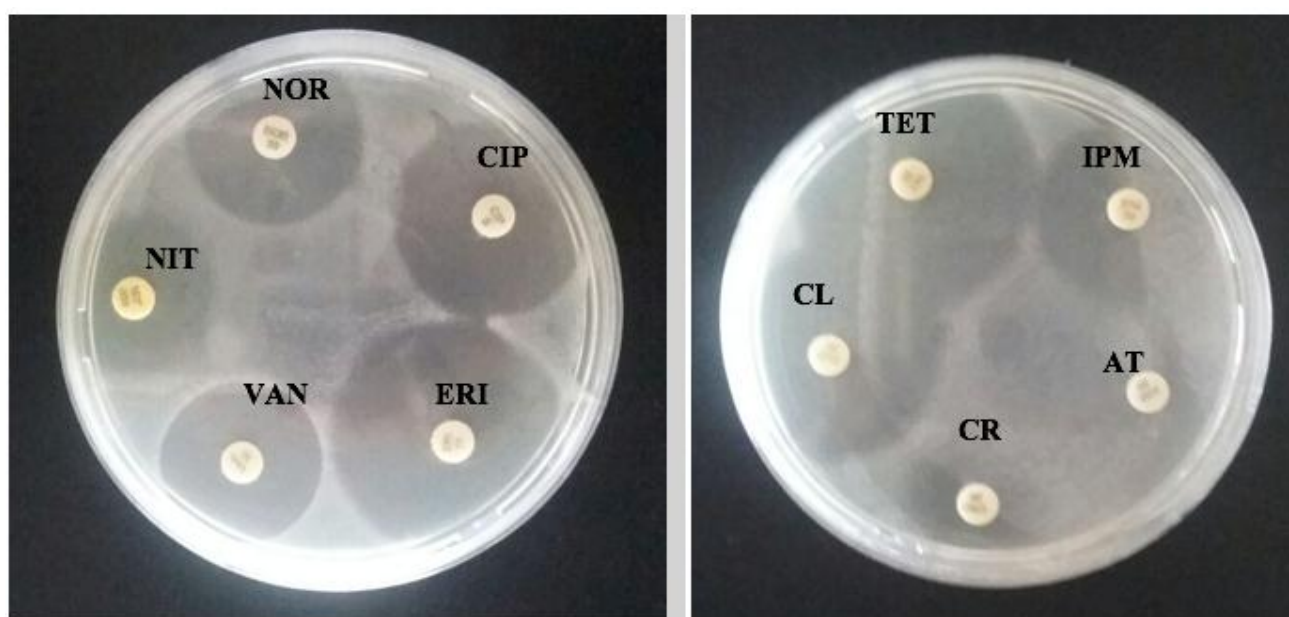

15

16 **Supplemental Figure S1.** Representative image of one selected strain challenged with different  
17 antibiotics. CRO=ceftriaxone 30 µg, IPM=imipenem 10 µg, ATM=aztreonam 30 µg,  
18 ERI=erythromycin 15 µg, VAN=vancomycin 30 µg, CLO=chloramphenicol 30 µg, TET=tetracycline  
19 30 µg, NIT=nitrofurantoin 300 µg, NOR=norfloxacin 10 µg e CIP=ciprofloxacin 5 µg.

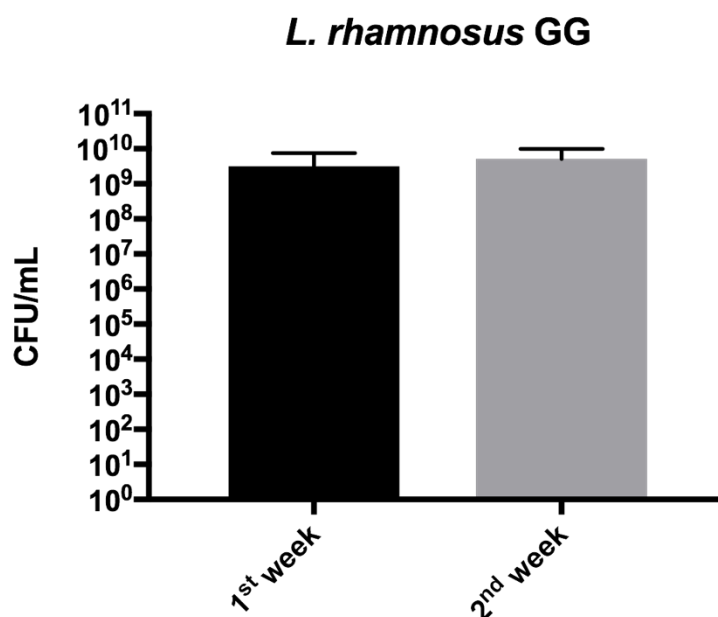

20

21 **Supplemental Figure S2.** Weekly average CFU counts of *Lactobacillus rhamnosus* GG. 1<sup>st</sup> week: before  
 22 the DSS administration; 2<sup>nd</sup> week: During DSS administration. Values are represented as the average  
 23 of four CFU counts along the week.

24

**Supplemental Table S1.** Weekly viability of the strains isolated from the DSS+PP group in log<sub>10</sub>CFU.

| Animal | Strain                      | 1 <sup>st</sup> week | 2 <sup>nd</sup> week |
|--------|-----------------------------|----------------------|----------------------|
| 1      | <i>Bifidobacterium</i> spp. | 9.23±0.02            | 9.97±0.02            |
|        | <i>Bifidobacterium</i> spp. | 9.21±0.02            | 9.57±0.01            |
|        | <i>Lactobacillus</i> spp.   | 9.64±0.06            | 9.85±0.03            |
| 2      | <i>Bifidobacterium</i> spp. | 9.34±0.02            | 9.62±0.02            |
|        | <i>Bifidobacterium</i> spp. | 9.00±0.03            | 9.35±0.02            |
|        | <i>Lactobacillus</i> spp.   | 9.22±0.03            | 9.19±0.02            |
| 3      | <i>Bifidobacterium</i> spp. | 9.52±0.03            | 9.80±0.01            |
|        | <i>Bifidobacterium</i> spp. | 9.32±0.02            | 9.62±0.06            |
|        | <i>Lactobacillus</i> spp.   | 9.30±0.04            | 9.61±0.09            |
| 4      | <i>Bifidobacterium</i> spp. | 9.40±0.06            | 9.17±0.09            |
|        | <i>Bifidobacterium</i> spp. | 9.94±0.02            | 9.17±0.06            |
|        | <i>Lactobacillus</i> spp.   | 9.66±0.01            | 9.62±0.02            |
| 5      | <i>Bifidobacterium</i> spp. | 9.28±0.02            | 9.91±0.02            |
|        | <i>Bifidobacterium</i> spp. | 9.52±0.02            | 9.97±0.01            |
|        | <i>Lactobacillus</i> spp.   | 9.28±0.01            | 9.72±0.02            |
| 6      | <i>Bifidobacterium</i> spp. | 9.12±0.04            | 9.17±0.03            |
|        | <i>Bifidobacterium</i> spp. | 9.18±0.01            | 9.76±0.01            |
|        | <i>Lactobacillus</i> spp.   | 9.83±0.03            | 9.90±0.06            |
| 7      | <i>Bifidobacterium</i> spp. | 9.62±0.08            | 9.70±0.03            |
|        | <i>Bifidobacterium</i> spp. | 9.38±0.03            | 9.80±0.04            |
|        | <i>Lactobacillus</i> spp.   | 9.20±0.04            | 9.80±0.04            |
| 8      | <i>Bifidobacterium</i> spp. | 9.24±0.02            | 9.80±0.04            |
|        | <i>Bifidobacterium</i> spp. | 9.22±0.06            | 9.77±0.02            |
|        | <i>Lactobacillus</i> spp.   | 9.90±0.04            | 9.96±0.02            |
| 9      | <i>Bifidobacterium</i> spp. | 9.25±0.02            | 9.50±0.02            |

|    |                             |           |           |
|----|-----------------------------|-----------|-----------|
|    | <i>Bifidobacterium</i> spp. | 9.64±0.02 | 9.99±0.01 |
|    | <i>Lactobacillus</i> spp.   | 9.32±0.01 | 9.57±0.06 |
|    | <i>Bifidobacterium</i> spp. | 9.40±0.02 | 9.66±0.05 |
| 10 | <i>Bifidobacterium</i> spp. | 9.62±0.04 | 9.62±0.04 |
|    | <i>Lactobacillus</i> spp.   | 9.50±0.08 | 9.90±0.02 |

25

26

27

Results correspond to the weekly average CFU counts ± standard deviation (SD) of each isolate from group DSS+PP.
